# Supplementary material
Source: publisher figshare collection journal article supplement (https://tandf.figshare.com/ndownloader/files/18004061)
Supplement: Supplementary file [file 18004061]

## Supplementary data

Table S1. Percentage of knees with medial and lateral gap sizes in extension for MA and rKA techniques in lower limbs with varus or valgus native alignment

| Extension space (mm) | Varus knees          |     |         |                       |     |         | Valgus knees         |      |         |                       |     |         |
|----------------------|----------------------|-----|---------|-----------------------|-----|---------|----------------------|------|---------|-----------------------|-----|---------|
|                      | Medial extension gap |     |         | Lateral extension gap |     |         | Medial extension gap |      |         | Lateral extension gap |     |         |
|                      | MA                   | rKA | p-value | MA                    | rKA | p-value | MA                   | rKA  | p-value | MA                    | rKA | p-value |
| < 12                 | 23                   | 2.1 | < 0.001 | 6.2                   | 0.0 | < 0.001 | 2.2                  | 0.0  | 0.01    | 47                    | 4.1 | < 0.001 |
| 12–13                | 41                   | 6.7 | < 0.001 | 33                    | 0.2 | < 0.001 | 11                   | 0.4  | < 0.001 | 42                    | 18  | < 0.001 |
| 14–15                | 31                   | 19  | < 0.001 | 41                    | 6.0 | < 0.001 | 44                   | 2.2  | < 0.001 | 10                    | 36  | < 0.001 |
| 16                   | 4.9                  | 72  | < 0.001 | 21                    | 94  | < 0.001 | 43                   | 97.4 | < 0.001 | 0.4                   | 42  | < 0.001 |

Categorical comparisons with Chi Squared test. The gap size in extension is the sum of the distal femoral bone resection and tibial bone resection. (Note: The sum of the tibial implant thickness and femoral implant thickness is 16 mm).

Table S2. Medial and lateral gap sizes modification in extension and resulting medio-lateral difference in mm for MA and rKA techniques in lower limbs with varus or valgus native alignment. Values are mean (SD) [range]

|                 | Varus knees              |                          |         | Valgus knees              |                          |         |
|-----------------|--------------------------|--------------------------|---------|---------------------------|--------------------------|---------|
|                 | MA                       | rKA                      | p-value | MA                        | rKA                      | p-value |
| Medial gap      | −3.3 (1.8) [−8.9 to 0.0] | −0.6 (1.1) [−6.5 to 0.0] | < 0.001 | −1.2 (1.3) [−7.6 to 0.0]  | 0 (0.3) [−3.8 to 0.0]    | < 0.001 |
| Lateral gap     | −2.1 (1.5) [−8.8 to 16]  | −0.1 (0.3) [−2.9 to 0.0] | < 0.001 | −4.4 (1.6) [−9.5 to −0.1] | −1.3 (1.5) [−7.1 to 0.0] | < 0.001 |
| ΔML             | 1.2 (2.4) [−4.7 to 8.9]  | 0.5 (1.2) [−2.9 to 6.5]  | < 0.001 | −3.3 (2.0) [−9.5 to 2.1]  | −1.3 (1.5) [−7.1 to 1.0] | < 0.001 |
| absolute values | 2.0(1.8) [0.0 to 8.9]    | 0.6 (1.1) [0.0 to 6.5]   | < 0.001 | 3.3 (1.9) [0.0 to 9.5]    | 1.3 (1.5) [0.0 to 7.1]   | < 0.001 |

The gap size modification is the sum of the distal femoral bone resection and tibial bone resection minus 16 mm (resection goal).

ΔML: lateral gap minus medial gap; a negative value represents a greater medial space than lateral space, whereas a positive value represents a greater lateral than medial space.

Distribution in native varus alignment (%)

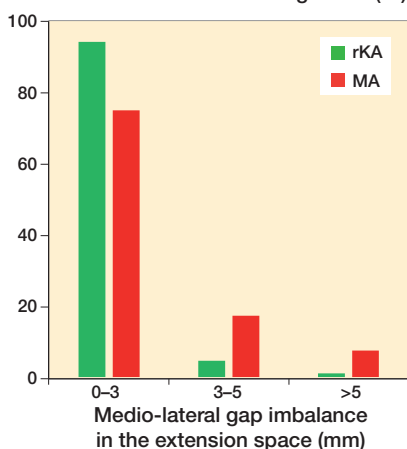

Figure S1. Extension space imbalance (medio-lateral gap difference in mm) for rKA and MA in lower limbs with varus native alignment ( $p < 0.001$ ).

Distribution in native valgus alignment (%)

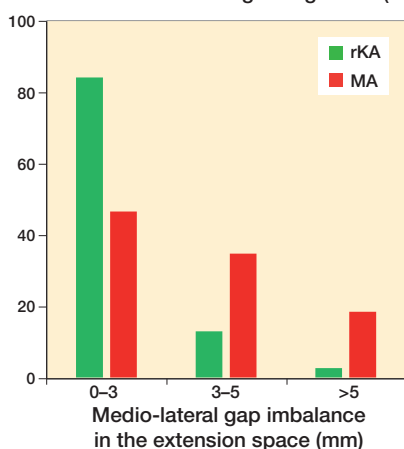

Figure S2. Extension space imbalance (medio-lateral gap difference in mm) for rKA and MA in lower limbs with valgus native alignment ( $p < 0.001$ ).

Table S3. Medial and lateral gaps sizes modification in flexion at 90° and resulting medio-lateral difference in mm for MA PC method, MA TEA method, and rKA techniques in lower limbs with varus or valgus native alignment. Values are mean (SD) [range]

|                 | MA PC method              | MA TEA method             | rKA                      | p-value: rKA vs<br>MA PC    MA TEA |         |
|-----------------|---------------------------|---------------------------|--------------------------|------------------------------------|---------|
| Varus knees     |                           |                           |                          |                                    |         |
| Medial gap      | -1.8 (1.7) [-6.5 to 16]   | -0.9 (1.8) [-6.8 to 3.5]  | -0.6 (1.1) [-6.5 to 0.0] | < 0.001                            | < 0.001 |
| Lateral gap     | -1.3 (0.3) [-6.5 to -0.9] | -2.3 (0.8) [-7.1 to -0.1] | 0.0 (0.2) [-2.0 to 0.0]  | < 0.001                            | < 0.001 |
| ΔML             | 0.5 (1.8) [-8.1 to 5.3]   | -1.4 (2.2) [-9.4 to 5.7]  | 0.6 (1.2) [-1.8 to 6.5]  | 0.06                               | < 0.001 |
| absolute values | 1.5 (1.2) [0.0 to 8.1]    | 2.1 (1.6) [0.0 to 9.4]    | 0.6 (1.1) [0.0 to 6.5]   | < 0.001                            | < 0.001 |
| Valgus knees    |                           |                           |                          |                                    |         |
| Medial gap      | 0.1 (1.3) [-6.5 to 1.7]   | 1.1 (1.6) [-6.7 to 4.3]   | 0.0 (0.3) [-3.8 to 0.0]  | 0.1                                | < 0.001 |
| Lateral gap     | -1.7 (1.0) [-7.3 to -0.9] | -2.7 (1.3) [-7.2 to -0.5] | -0.8 (1.3) [-6.0 to 0.0] | < 0.001                            | < 0.001 |
| ΔML             | -1.8 (2.0) [-8.4 to 5.4]  | -3.8 (2.6) [-10 to 5.7]   | -0.8 (1.3) [-6.1 to 3.8] | < 0.001                            | < 0.001 |
| absolute values | 2.1 (1.6) [0.0 to 8.4]    | 3.9 (2.3) [0.0 to 10]     | 0.9 (1.3) [0.0 to 6.1]   | < 0.001                            | < 0.001 |

ΔML see Table S2.

Table S4. Flexion-extension differences for the medial and lateral compartments in mm for MA PC method, MA TEA method, and rKA techniques in lower limbs with varus or valgus native alignment. Values are mean (SD) [range]

|                 | MA PC method              | MA TEA method             | rKA                      | p-value: rKA vs<br>MA PC    MA TEA |        |
|-----------------|---------------------------|---------------------------|--------------------------|------------------------------------|--------|
| Varus knees     |                           |                           |                          |                                    |        |
| Medial ΔFE      | -1.5 (0.6) [-6.6 to -0.9] | -2.4 (1.0) [-8.2 to -0.3] | 0.0 (0.0) [-0.6 to 0.0]  | <0.001                             | <0.001 |
| absolute values | 1.5 (0.6) [0.9 to 6.6]    | 2.4 (1.0) [0.3 to 8.2]    | 0.0 (0.0) [0.0 to 0.6]   | <0.001                             | <0.001 |
| Lateral ΔFE     | -0.7 (1.5) [-5.9 to 1.7]  | 0.2 (1.8) [-6.1 to 4.4]   | 0.0 (0.2) [-2.9 to 0.0]  | <0.001                             | <0.001 |
| absolute values | 1.4 (1.0) [0.0 to 5.9]    | 1.5 (1.0) [0.0 to 6.1]    | 0.0 (0.2) [0.0 to 2.9]   | <0.001                             | <0.001 |
| Valgus knees    |                           |                           |                          |                                    |        |
| Medial ΔFE      | -1.2 (0.1) [-1.7 to -0.9] | -2.2 (0.8) [-4.3 to -0.5] | 0.0 (0.0) [0.0 to 0.0]   | <0.001                             | <0.001 |
| absolute values | 1.2 (0.1) [0.9 to 1.7]    | 2.2 (0.8) [0.5 to 4.3]    | 0.0 (0.0) [0.0 to 0.0]   | <0.001                             | <0.001 |
| Lateral ΔFE     | -2.7 (1.5) [-6.5 to 1.2]  | -1.7 (1.7) [-6.7 to 2.9]  | -0.5 (0.8) [-3.7 to 0.0] | <0.001                             | <0.001 |
| absolute values | 2.8 (1.4) [0.0 to 6.5]    | 2.0 (1.3) [0.0 to 6.7]    | 0.5 (0.8) [0.0 to 3.7]   | <0.001                             | <0.001 |

ΔFE: extension gap minus flexion gap; a negative value represents a greater flexion space than extension space, whereas a positive value represents a larger extension than flexion space.

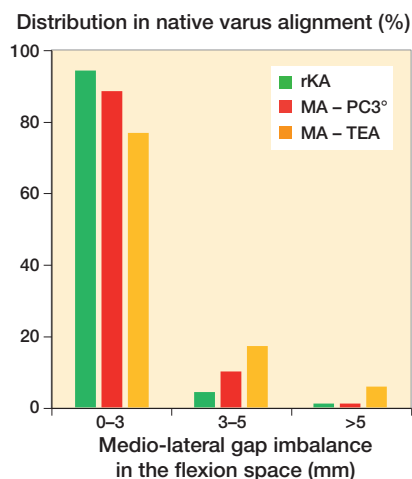

Figure S3. Flexion space imbalance (medio-lateral gap difference in mm) for rKA and MA with PC 3° ( $p < 0.001$ ) or TEA ( $p < 0.001$ ) techniques in lower limbs with varus native alignment.

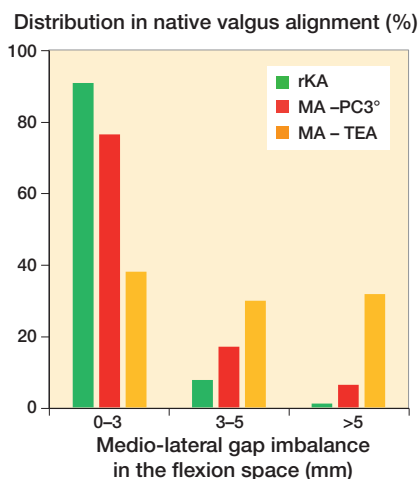

Figure S4. Flexion space imbalance (medio-lateral gap difference in mm) for rKA and MA with PC 3° ( $p < 0.001$ ) or TEA ( $p < 0.001$ ) techniques in lower limbs with valgus native alignment.

Table S5. Percentage of knees with medial or lateral compartment imbalance (flexion vs extension gap) for MA PC method, MA TEA method, and rKA techniques in lower limbs with varus or valgus native alignment

|                                        | Varus knees |               |         |     |                |         | Valgus knees |               |         |     |                |         |
|----------------------------------------|-------------|---------------|---------|-----|----------------|---------|--------------|---------------|---------|-----|----------------|---------|
|                                        | MA          | Medial<br>rKA | p-value | MA  | Lateral<br>rKA | p-value | MA           | Medial<br>rKA | p-value | MA  | Lateral<br>rKA | p-value |
| PC method                              |             |               |         |     |                |         |              |               |         |     |                |         |
| Ext. gap < 15 mm and flex. gap ≥ 16 mm | 5.8         | 0.0           | < 0.001 | 0.0 | 1.2            | 0.008   | 3.8          | 0.0           | < 0.001 | 0.0 | 13             | < 0.001 |
| Ext. gap ≥ 16 mm and flex. gap < 15 mm | 0.0         | 0.0           | N/A     | 14  | 0.0            | < 0.001 | 0.0          | 0.0           | N/A     | 0.0 | 0.0            | N/A     |
| Total                                  | 5.8         | 0.0           | < 0.001 | 14  | 1.2            | < 0.001 | 3.8          | 0.0           | < 0.001 | 0.0 | 13             | < 0.001 |
| TEA method                             |             |               |         |     |                |         |              |               |         |     |                |         |
| Ext. gap < 15 mm and flex. gap ≥ 16 mm | 23          | 0.0           | < 0.001 | 0.0 | 1.2            | 0.008   | 24           | 0.0           | < 0.001 | 0.0 | 13             | < 0.001 |
| Ext. gap ≥ 16 mm and flex. gap < 15 mm | 0.0         | 0.0           | N/A     | 13  | 0.0            | < 0.001 | 0.0          | 0.0           | N/A     | 0.0 | 0.0            | N/A     |
| Total                                  | 23          | 0.0           | < 0.001 | 13  | 1.2            | < 0.001 | 24           | 0.0           | < 0.001 | 0.0 | 13             | < 0.001 |

Table S6. Percentage of knees where a space imbalance is present in both the extension and flexion for MA PC method, MA TEA method, and rKA techniques in lower limbs with varus or valgus native alignment

|        | Varus knees |        |     | p-value: rKA vs |         | Valgus knees |        |     | p-value: rKA vs |         |
|--------|-------------|--------|-----|-----------------|---------|--------------|--------|-----|-----------------|---------|
|        | MA PC       | MA TEA | rKA | MA PC           | MA TEA  | MA PC        | MA TEA | rKA | MA PC           | MA TEA  |
| ≤ 3 mm | 70          | 57     | 94  | < 0.001         | < 0.001 | 43           | 27     | 84  | < 0.001         | < 0.001 |
| ≤ 5 mm | 92          | 87     | 99  | < 0.001         | < 0.001 | 80           | 62     | 97  | < 0.001         | < 0.001 |
| > 5 mm | 0.7         | 0.5    | 1.1 | 0.5             | 0.2     | 5.2          | 13     | 1.1 | 0.001           | < 0.001 |
